# Supplementary material for: Surface Redox Reaction for the Synthesis of NiPt Catalysts for the Upgrading of Renewable Ethanol/Methanol Mixtures
Source: MDPI journal article supplement (doi:10.3390/catal14010077), 2024-01-17
Supplement: s1 [file s1]

Archive with 1 entries (1 files):
- catalysts-2794034-supplementary.pdf
